# Supplementary material
Source: publisher site journal article supplement (https://www.dovepress.com/get_supplementary_file.php?f=233197.docx)
Supplement: Supplementary file 1 [file get_supplementary_file.php]

# Supplementary Material Table of Contents

Supplementary Table 1. Attributable fractions for risk factors of 1-year mortality, by baseline vintage

Supplementary Table 2. Attributable fractions for risk factors of 1-year mortality for incident (< 60 days vintage) patients, by DOPPS phase

Supplementary Table 3. Attributable fractions for risk factors of 1-year mortality for incident (< 60 days vintage) patients, by race in North America

Supplementary Table 4. Attributable fractions for risk factors of 1-year mortality for incident (<60 days) patients: Impact of CRP inclusion

# Supplementary Table 1. Attributable fractions for risk factors of 1-year mortality, by baseline vintage

|  | **Vintage < 60 days (N=15891)** | | |  | **Vintage 60 days - 1 year (N=20738)** | | |  | **Vintage > 1 year (N=51565)** | | |
| --- | --- | --- | --- | --- | --- | --- | --- | --- | --- | --- | --- |
| **Risk Factor** | **% pts** | **HR (95% CI)** | **AF (95% CI)** |  | **% pts** | **HR (95% CI)** | **AF (95% CI)** |  | **% pts** | **HR (95% CI)** | **AF (95% CI)** |
| Catheter use | 57% | 1.52 (1.37-1.71) | 22% (17-27%) |  | 42% | 1.57 (1.42-1.73) | 19% (15-23%) |  | 15% | 1.22 (1.13-1.31) | 4% (2-5%) |
| Albumin < 3.5 g/dL | 51% | 1.51 (1.35-1.68) | 19% (14-24%) |  | 33% | 1.72 (1.56-1.91) | 20% (16-23%) |  | 22% | 1.80 (1.70-1.90) | 15% (14-17%) |
| Creatinine < 6 mg/dL | 43% | 1.32 (1.18-1.48) | 12% (7-16%) |  | 38% | 1.21 (1.09-1.34) | 8% (3-12%) |  | 14% | 1.30 (1.22-1.43) | 5% (4-7%) |
| Lack of pre-ESRD care | 26% | 1.38 (1.24-1.56) | 9% (6-12%) |  | -- | -- | -- |  | -- | -- | -- |
| No reported RUV | 32% | 1.32 (1.18-1.50) | 9% (5-12%) |  | 48% | 1.33 (1.18-1.50) | 12% (7-17%) |  | -- | -- | -- |
| SBP > 160 mm Hg | 27% | 0.87 (0.78-0.99) | 8% (4-12%) |  | 23% | 0.96 (0.85-1.08) | 10% (6-13%) |  | 25% | 1.01 (0.93-1.09) | 8% (5-10%) |
| SBP < 130 mm Hg | 23% | 1.51 (1.35-1.70) |  | 26% | 1.45 (1.32-1.62) |  | 25% | 1.37 (1.26-1.43) |
| Phosphorus > 5.5 mg/dL | 39% | 1.20 (1.06-1.36) | 7% (2-11%) |  | 36% | 1.12 (1.01-1.25) | 5% (2-9%) |  | 41% | 1.23 (1.16-1.30) | 8% (5-10%) |
| Phosphorus < 3.5 mg/dL | 13% | 1.12 (0.96-1.31) |  | 12% | 1.18 (1.03-1.34) |  | 11% | 1.12 (1.03-1.22) |
| Hemoglobin > 12 g/dL | 9% | 1.04 (0.87-1.27) | 6% (1-11%) |  | 23% | 0.87 (0.77-0.98) | 5% (1-8%) |  | 23% | 0.91 (0.85-0.98) | 3% (1-5%) |
| Hemoglobin < 10 g/dL | 50% | 1.14 (1.02-1.29) |  | 23% | 1.37 (1.22-1.53) |  | 22% | 1.28 (1.18-1.36) |
| WBC count > 10,000/μL | 19% | 1.30 (1.17-1.46) | 5% (3-8%) |  | 12% | 1.25 (1.11-1.42) | 3% (1-5%) |  | 9% | 1.31 (1.21-1.43) | 3% (2-4%) |
| Ferritin > 800 ng/mL | 8% | 1.35 (1.14-1.63) | 2% (1-4%) |  | 13% | 1.28 (1.13-1.45) | 3% (2-5%) |  | 22% | 1.07 (0.99-1.14) | 1% (0-3%) |
| Calcium > 9.5 mg/dL | 13% | 1.09 (0.92-1.27) | 0% (0-4%) |  | 19% | 1.11 (0.98-1.27) | 3% (0-6%) |  | 30% | 1.14 (1.06-1.21) | 5% (3-8%) |
| Calcium < 8.4 mg/dL | 38% | 0.96 (0.86-1.08) |  | 22% | 1.05 (0.93-1.19) |  | 16% | 1.15 (1.06-1.26) |
| PTH > 300 pg/mL | 39% | 0.88 (0.76-1.01) | 0% (0-1%) |  | 32% | 1.00 (0.88-1.13) | 0% (0-6%) |  | 38% | 1.11 (1.03-1.19) | 5% (2-9%) |
| PTH < 150 pg/mL | 33% | 0.92 (0.77-1.04) |  | 38% | 1.00 (0.91-1.13) |  | 34% | 1.07 (0.99-1.14) |
| **Combined AF** |  |  |  |  |  |  |  |  |  |  |  |
| Malnutrition* | -- | -- | 29% (23-35%) |  | -- | -- | 26% (21-31%) |  | -- | -- | 20% (18-22%) |
| Inflammation* | -- | -- | 8% (5-10%) |  | -- | -- | 6% (4-9%) |  | -- | -- | 4% (2-6%) |
| MBD abnormality* | -- | -- | 0% (0-10%) |  | -- | -- | 8% (0-15%) |  | -- | -- | 17% (13-21%) |
| All risk factors | -- | -- | 65% (59-71%) |  | -- | -- | 62% (56-67%) |  | -- | -- | 46% (41-50%) |

Cox models for 12 risk factors chosen *a priori*, stratified by DOPPS phase and country, adjusted for all other variables in table, plus age, sex, black race, BMI, and 12 comorbidities listed in Table 1; HR=Hazard Ratio of 1 year mortality; AF=Attributable Fraction; ESRD=end-stage renal disease; SBP=systolic blood pressure; WBC=white blood cell; MBD=mineral and bone disorder; RUV=residual urine volume; *Malnutrition variables include low albumin and low creatinine; Inflammation variables include high WBC and high ferritin; MBD variables include high or low calcium, phosphorus and PTH; Note pre-ESRD care data were only available for incident patients and RUV was assumed to be minimal for patients on dialysis > 1 year; 95% CI: 2.5th and 97.5th percentiles from 1000 runs: 100 bootstrapped samples combined across 10 imputations; Negative values of AF could be obtained when the observed HR was less than 1, and we report the negative AFs and/or CI bounds as 0% to convey that no excess mortality risk was attributable to the exposure

# Supplementary Table 2. Attributable fractions for risk factors of 1-year mortality among incident (< 60 days vintage) patients, by DOPPS phase

|  | **Phase 1-2, 1996-2004 (N=9580)** | | |  | **Phase 3-5, 2005-2015 (N=6311)** | | |
| --- | --- | --- | --- | --- | --- | --- | --- |
| **Risk Factor** | **% pts** | **HR (95% CI)** | **AF (95% CI)** |  | **% pts** | **HR (95% CI)** | **AF (95% CI)** |
| Catheter use | 56% | 1.46 (1.26-1.70) | 19% (12-27%) |  | 59% | 1.74 (1.41-2.13) | 29% (19-38%) |
| Albumin < 3.5 g/dL | 53% | 1.49 (1.26-1.71) | 19% (11-25%) |  | 49% | 1.55 (1.25-1.92) | 20% (10-29%) |
| Creatinine < 6 mg/dL | 37% | 1.32 (1.15-1.52) | 10% (5-15%) |  | 53% | 1.35 (1.08-1.70) | 15% (4-26%) |
| Lack of pre-ESRD care | 26% | 1.35 (1.18-1.57) | 8% (4-12%) |  | 27% | 1.49 (1.22-1.85) | 11% (6-18%) |
| No reported RUV | 28% | 1.37 (1.19-1.57) | 9% (5-13%) |  | 38% | 1.25 (0.98-1.51) | 8% (0-15%) |
| SBP > 160 mm Hg | 29% | 0.87 (0.74-1.00) | 6% (1-11%) |  | 23% | 0.88 (0.68-1.14) | 11% (4-19%) |
| SBP < 130 mm Hg | 21% | 1.48 (1.29-1.70) |  | 27% | 1.60 (1.30-1.95) |
| Phosphorus > 5.5 mg/dL | 47% | 1.25 (1.07-1.44) | 9% (3-15%) |  | 28% | 1.13 (0.88-1.43) | 3% (0-9%) |
| Phosphorus < 3.5 mg/dL | 10% | 1.21 (0.98-1.48) |  | 17% | 1.01 (0.79-1.25) |
| Hemoglobin > 12 g/dL | 9% | 1.13 (0.89-1.39) | 5% (0-10%) |  | 9% | 0.87 (0.59-1.19) | 9% (0-18%) |
| Hemoglobin < 10 g/dL | 53% | 1.10 (0.97-1.24) |  | 46% | 1.30 (1.05-1.57) |
| WBC count > 10,000/μL | 21% | 1.30 (1.13-1.48) | 6% (3-8%) |  | 15% | 1.28 (0.98-1.59) | 4% (0-7%) |
| Ferritin > 800 ng/mL | 6% | 1.22 (0.93-1.60) | 1% (0-3%) |  | 10% | 1.62 (1.24-2.10) | 6% (2-9%) |
| Calcium > 9.5 mg/dL | 15% | 1.08 (0.87-1.31) | 0% (0-5%) |  | 10% | 1.11 (0.80-1.51) | 0% (0-6%) |
| Calcium < 8.4 mg/dL | 39% | 0.98 (0.86-1.13) |  | 35% | 0.92 (0.75-1.14) |
| PTH > 300 pg/mL | 35% | 0.95 (0.81-1.15) | 0% (0-8%) |  | 44% | 0.76 (0.59-0.95) | 0% (0-0%) |
| PTH < 150 pg/mL | 37% | 1.01 (0.85-1.17) |  | 26% | 0.72 (0.58-0.91) |
| **Combined AF** |  |  |  |  |  |  |  |
| Malnutrition* | -- | -- | 28% (20-34%) |  | -- | -- | 32% (22-42%) |
| Inflammation* | -- | -- | 7% (3-10%) |  | -- | -- | 9% (5-14%) |
| MBD abnormality* | -- | -- | 9% (0-20%) |  | -- | -- | 0% (0-0%) |
| All risk factors | -- | -- | 65% (57-72%) |  | -- | -- | 68% (56-76%) |

Cox models stratified by DOPPS phase and country, adjusted for all other variables in table, plus age, sex, black race, BMI, and 12 comorbidities listed in Table 1; HR=Hazard Ratio of 1 year mortality; AF=Attributable Fraction; ESRD=end-stage renal disease; SBP=systolic blood pressure; WBC=white blood cell; MBD=mineral and bone disorder; RUV= residual urine volume; *Malnutrition variables include low albumin and low creatinine; Inflammation variables include high WBC and high ferritin; MBD variables include high or low calcium, phosphorus and PTH; 95% CI: 2.5th and 97.5th percentiles from 1000 runs: 100 bootstrapped samples combined across 10 imputations; Negative values of AF could be obtained when the observed HR was less than 1, and we report the negative AFs and/or CI bounds as 0% to convey that no excess mortality risk was attributable to the exposure

# Supplementary Table 3. Attributable fractions for risk factors of 1-year mortality among incident (< 60 days vintage) patients, by race in North America

|  | **Black patients (N=2354)** | | |  | **Non-black patients (N=6429)** | | |
| --- | --- | --- | --- | --- | --- | --- | --- |
| **Risk Factor** | **% pts** | **HR (95% CI)** | **AF (95% CI)** |  | **% pts** | **HR (95% CI)** | **AF (95% CI)** |
| Catheter use | 72% | 1.53 (1.08-2.22) | 25% (5-43%) |  | 70% | 1.47 (1.25-1.73) | 22% (13-30%) |
| Albumin < 3.5 g/dL | 54% | 1.67 (1.18-2.35) | 25% (8-40%) |  | 54% | 1.52 (1.32-1.79) | 19% (13-26%) |
| Creatinine < 6 mg/dL | 36% | 1.51 (1.06-2.14) | 14% (2-25%) |  | 54% | 1.28 (1.10-1.51) | 11% (4-19%) |
| Lack of pre-ESRD care | 33% | 1.37 (1.03-1.91) | 10% (1-20%) |  | 29% | 1.35 (1.14-1.61) | 8% (4-13%) |
| No reported RUV | 43% | 1.54 (1.11-2.19) | 16% (4-29%) |  | 41% | 1.33 (1.13-1.61) | 10% (4-17%) |
| SBP > 160 mm Hg | 34% | 0.89 (0.64-1.22) | 5% (0-16%) |  | 26% | 0.87 (0.73-1.04) | 9% (4-15%) |
| SBP < 130 mm Hg | 19% | 1.44 (1.02-1.96) |  | 26% | 1.56 (1.35-1.82) |
| Phosphorus > 5.5 mg/dL | 34% | 1.50 (1.01-2.20) | 13% (0-25%) |  | 39% | 1.17 (1.00-1.40) | 5% (0-12%) |
| Phosphorus < 3.5 mg/dL | 14% | 1.18 (0.76-1.77) |  | 13% | 1.08 (0.86-1.30) |
| Hemoglobin > 12 g/dL | 8% | 1.15 (0.58-1.99) | 8% (0-24%) |  | 10% | 1.01 (0.78-1.30) | 2% (0-8%) |
| Hemoglobin < 10 g/dL | 55% | 1.17 (0.86-1.61) |  | 46% | 1.04 (0.90-1.20) |
| WBC count > 10,000/μL | 18% | 1.04 (0.69-1.53) | 1% (0-8%) |  | 23% | 1.27 (1.10-1.47) | 5% (2-8%) |
| Ferritin > 800 ng/mL | 12% | 1.51 (0.95-2.36) | 5% (0-11%) |  | 8% | 1.24 (0.90-1.61) | 2% (0-3%) |
| Calcium > 9.5 mg/dL | 10% | 1.38 (0.83-2.18) | 7% (0-19%) |  | 11% | 1.08 (0.86-1.34) | 0% (0-4%) |
| Calcium < 8.4 mg/dL | 38% | 1.13 (0.81-1.56) |  | 38% | 0.93 (0.81-1.08) |
| PTH > 300 pg/mL | 55% | 0.84 (0.56-1.25) | 0% (0-17%) |  | 38% | 0.89 (0.74-1.07) | 0% (0-3%) |
| PTH < 150 pg/mL | 21% | 1.05 (0.68-1.66) |  | 33% | 0.90 (0.75-1.07) |
| **Combined AF** |  |  |  |  |  |  |  |
| Malnutrition* | -- | -- | 36% (20-50%) |  | -- | -- | 29% (20-37%) |
| Inflammation* | -- | -- | 6% (0-14%) |  | -- | -- | 7% (3-10%) |
| MBD abnormality* | -- | -- | 14% (0-40%) |  | -- | -- | 0% (0-9%) |
| All risk factors | -- | -- | 77% (62-87%) |  | -- | -- | 64% (54-72%) |

Cox models stratified by DOPPS phase and country, adjusted for all other variables in table, plus age, sex, BMI, and 12 comorbidities listed in Table 1; HR=Hazard Ratio of 1 year mortality; AF=Attributable Fraction; ESRD=end-stage renal disease; SBP=systolic blood pressure; WBC=white blood cell; MBD=mineral and bone disorder; RUV= residual urine volume; *Malnutrition variables include low albumin and low creatinine; Inflammation variables include high WBC and high ferritin; MBD variables include high or low calcium, phosphorus and PTH; 95% CI: 2.5th and 97.5th percentiles from 1000 runs: 100 bootstrapped samples combined across 10 imputations; Negative values of AF could be obtained when the observed HR was less than 1, and we report the negative AFs and/or CI bounds as 0% to convey that no excess mortality risk was attributable to the exposure

# Supplementary Table 4. Attributable fractions for risk factors of 1-year mortality for incident (<60 days) patients: Impact of CRP inclusion

|  | **Primary analysis (N=15891)** | | |  | **Subset with CRP data (N=3596)** | | |  | **Subset with CRP data (N=3596)** | | |
| --- | --- | --- | --- | --- | --- | --- | --- | --- | --- | --- | --- |
|  | **Not including CRP** | | |  | **Not including CRP** | | |  | **Including CRP** | | |
| **Risk Factor** | **% pts** | **HR (95% CI)** | **AF (95% CI)** |  | **% pts** | **HR (95% CI)** | **AF (95% CI)** |  | **% pts** | **HR (95% CI)** | **AF (95% CI)** |
| CRP > 10 mg/L | -- | -- | -- |  | -- | -- | -- |  | 40% | 1.64 (1.21-2.22) | 21% (8-33%) |
| Catheter use | 57% | 1.52 (1.37-1.71) | 22% (17-27%) |  | 44% | 1.61 (1.19-2.19) | 22% (8-34%) |  | 44% | 1.53 (1.10-2.07) | 20% (5-33%) |
| Albumin < 3.5 g/dL | 51% | 1.51 (1.35-1.68) | 19% (14-24%) |  | 51% | 1.58 (1.18-2.16) | 22% (8-35%) |  | 51% | 1.48 (1.10-2.02) | 19% (5-32%) |
| Creatinine < 6 mg/dL | 43% | 1.32 (1.18-1.48) | 12% (7-16%) |  | 41% | 1.13 (0.85-1.51) | 5% (0-17%) |  | 41% | 1.12 (0.84-1.48) | 5% (0-16%) |
| Lack of pre-ESRD care | 26% | 1.38 (1.24-1.56) | 9% (6-12%) |  | 22% | 1.48 (1.12-1.96) | 9% (3-16%) |  | 22% | 1.46 (1.11-1.94) | 9% (2-16%) |
| No reported RUV | 32% | 1.32 (1.18-1.50) | 9% (5-12%) |  | 21% | 1.21 (0.84-1.64) | 4% (0-10%) |  | 21% | 1.20 (0.84-1.63) | 3% (0-9%) |
| SBP > 160 mm Hg | 27% | 0.87 (0.78-0.99) | 8% (4-12%) |  | 24% | 0.77 (0.53-1.10) | 4% (0-14%) |  | 24% | 0.78 (0.53-1.09) | 4% (0-14%) |
| SBP < 130 mm Hg | 23% | 1.51 (1.35-1.70) |  | 24% | 1.42 (1.05-1.86) |  | 24% | 1.40 (1.04-1.84) |
| Phosphorus > 5.5 mg/dL | 39% | 1.20 (1.06-1.36) | 7% (2-11%) |  | 38% | 1.18 (0.89-1.54) | 6% (0-16%) |  | 38% | 1.17 (0.88-1.52) | 5% (0-15%) |
| Phosphorus < 3.5 mg/dL | 13% | 1.12 (0.96-1.31) |  | 14% | 1.12 (0.76-1.58) |  | 14% | 1.08 (0.73-1.52) |
| Hemoglobin > 12 g/dL | 9% | 1.04 (0.87-1.27) | 6% (1-11%) |  | 11% | 1.01 (0.64-1.56) | 7% (0-20%) |  | 11% | 1.04 (0.67-1.63) | 6% (0-18%) |
| Hemoglobin < 10 g/dL | 50% | 1.14 (1.02-1.29) |  | 48% | 1.20 (0.92-1.60) |  | 48% | 1.15 (0.89-1.53) |
| WBC count > 10,000/μL | 19% | 1.30 (1.17-1.46) | 5% (3-8%) |  | 15% | 1.26 (0.91-1.72) | 4% (0-9%) |  | 15% | 1.16 (0.84-1.62) | 2% (0-8%) |
| Ferritin > 800 ng/mL | 8% | 1.35 (1.14-1.63) | 2% (1-4%) |  | 6% | 1.60 (1.08-2.31) | 4% (1-7%) |  | 6% | 1.54 (1.03-2.22) | 3% (0-7%) |
| Calcium > 9.5 mg/dL | 13% | 1.09 (0.92-1.27) | 0% (0-4%) |  | 15% | 0.83 (0.51-1.23) | 0% (0-9%) |  | 15% | 0.83 (0.51-1.24) | 0% (0-8%) |
| Calcium < 8.4 mg/dL | 38% | 0.96 (0.86-1.08) |  | 39% | 0.99 (0.73-1.31) |  | 39% | 0.96 (0.71-1.27) |
| PTH > 300 pg/mL | 39% | 0.88 (0.76-1.01) | 0% (0-1%) |  | 34% | 0.88 (0.63-1.20) | 0% (0-8%) |  | 34% | 0.88 (0.63-1.19) | 0% (0-7%) |
| PTH < 150 pg/mL | 33% | 0.92 (0.77-1.04) |  | 34% | 0.87 (0.65-1.19) |  | 34% | 0.84 (0.63-1.14) |
| **Combined AF** |  |  |  |  |  |  |  |  |  |  |  |
| Malnutrition* | -- | -- | 29% (23-35%) |  | -- | -- | 26% (10-41%) |  | -- | -- | 23% (6-39%) |
| Inflammation* | -- | -- | 8% (5-10%) |  | -- | -- | 7% (1-14%) |  | -- | -- | 26% (13-37%) |
| MBD abnormality* | -- | -- | 0% (0-10%) |  | -- | -- | 0% (0-17%) |  | -- | -- | 0% (0-14%) |
| All risk factors | -- | -- | 65% (59-71%) |  | -- | -- | 59% (42-72%) |  | -- | -- | 63% (47-75%) |

Cox models stratified by DOPPS phase and country, adjusted for all other variables in table, plus age, sex, black race, BMI, and 12 comorbidities listed in Table 1; HR=Hazard Ratio of 1 year mortality; AF=Attributable Fraction; ESRD=end-stage renal disease; SBP=systolic blood pressure; WBC=white blood cell; MBD=mineral and bone disorder; RUV= residual urine volume; CRP=C-reactive protein; *Malnutrition variables include low albumin and low creatinine; Inflammation variables include high WBC, high ferritin, and high CRP; MBD variables include high or low calcium, phosphorus and PTH; 95% CI: 2.5th and 97.5th percentiles from 1000 runs: 100 bootstrapped samples combined across 10 imputations; Negative values of AF could be obtained when the observed HR was less than 1, and we report the negative AFs and/or CI bounds as 0% to convey that no excess mortality risk was attributable to the exposure
